# Supplementary material
Source: PubMed Central journal article supplement (PMC7007371)
Supplement: NIHMS1542654-supplement-2.pdf [file NIHMS1542654-supplement-2.pdf]

## **Supplementary Data**

**Suppl. Figure 1.** Dietary administration of bisphosphonates and/or metformin did not cause any toxicity in experimental animals. Comparison of the body and organ weights between control and experimental groups. Bodyweight chart showing the similarity in the weight gain between the control rats and rats fed experimental diets (A). At termination, weights of the kidneys, liver, and spleen were recorded. Then, the organ-to-body-weight ratio of each animal was calculated. Relative organ weights of the kidneys (B), liver (C), and spleen (D) showed no significant difference between control and experimental groups.

**Suppl. Figure 2.** Serum Chemistry Analysis. Using an IDEXX chemistry analyzer, we analyzed serum for liver function parameters ALK (A) and ALT (B) and kidney function parameters BUN (C) and CREA (D) to determine the effect of chemoprevention agents on these organs. There was no significant difference between control and treated rats. While ALT was elevated in both control and treated groups, there was no significant difference between groups. Also ALKP, BUN, and CREA were within the normal range (shaded green area) with no significant difference between the groups.

**Supplementary. Table 1.** Comparison of various serum parameters from control and combination-treated rats.
