# Supplementary material
Source: PubMed Central journal article supplement (PMC7007371)
Supplement: NIHMS1542654-supplement-3.pdf [file NIHMS1542654-supplement-3.pdf]

**Supplementary. Table 1.** Comparison of various serum parameters from control and combination-treated rats.

|              | Control       | Met+Zom       | Met+Fos        |
|--------------|---------------|---------------|----------------|
| ALB (g/dL)   | 3.2 ± 0.1     | 3.7 ± 0.3     | 3.2 ± 0.3      |
| GLOB (g/dL)  | 3.0 ± 0.1     | 3.2 ± 0.2     | 3.1 ± 0.0      |
| ALB/GLOB     | 1.0 ± 0.1     | 1.2 ± 0.0     | 1.0 ± 0.1      |
| GLU (mg/dL)  | 181.7 ± 0.9   | 183.7 ± 5.2   | 186.3 ± 21.2   |
| PHOS (mg/dL) | 6.5 ± 0.9     | 6.5 ± 0.5     | 5.7 ± 0.2      |
| Ca (mg/dL)   | 10.3 ± 0.1    | 10.5 ± 0.1    | 10.4 ± 0.3     |
| TP (g/dL)    | 6.2 ± 0.0     | 6.9 ± 0.5     | 6.3 ± 0.3      |
| TBIL (mg/dL) | 0.3 ± 0.2     | 0.4 ± 0.7     | 0.3 ± 0.1      |
| CHOL (mg/dL) | 91.3 ± 4.8    | 124.0 ± 4.6   | 106.0 ± 21.6   |
| AMYL (U/L)   | 1748.7 ± 55.8 | 1779.7 ± 65.1 | 1729.3 ± 126.9 |
| LIPA (U/L)   | 145.3 ± 11.6  | 131.3 ± 4.8   | 125.3 ± 22.0   |

ALB-Albumin; Glob-Globulin; Glu-Glucose; Phos-Inorganic Phosphate; Ca-Calcium; TP-Total protein; TBIL – Total bilirubin; Chol-Cholesterol; Amyl-Amylase; Lipa-Lipase.
