# Supplementary material
Source: PubMed Central journal article supplement (PMC7007371)

Supplementary Figure 1

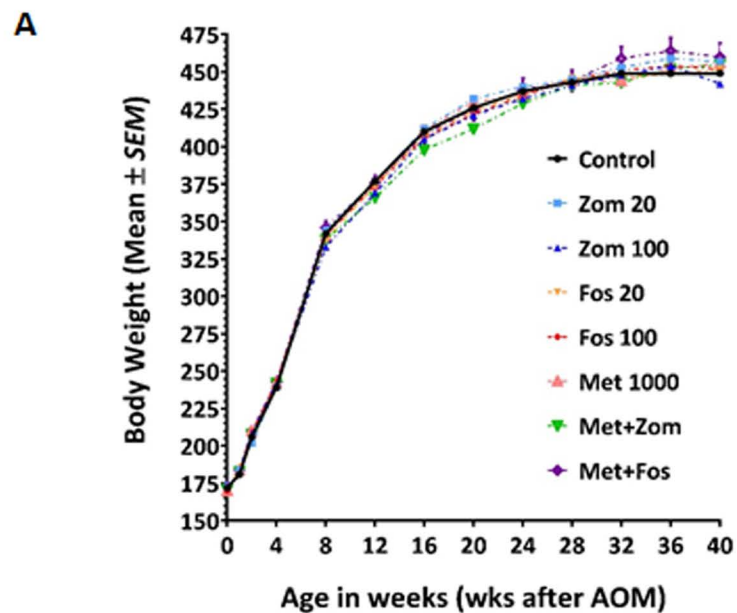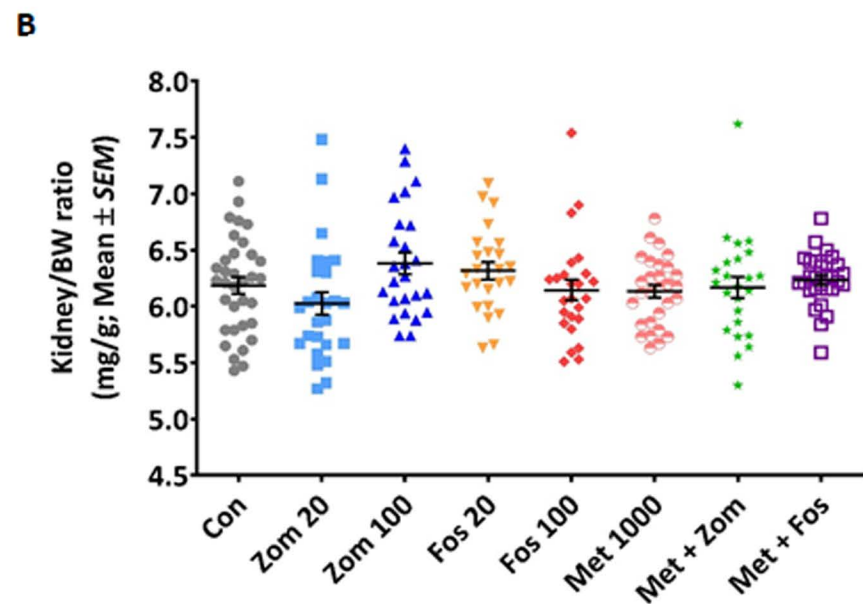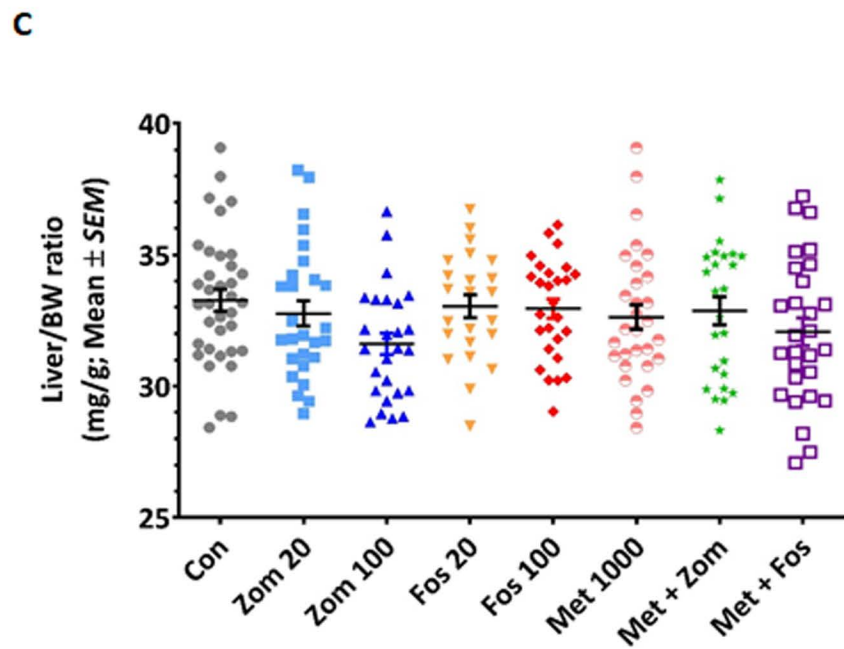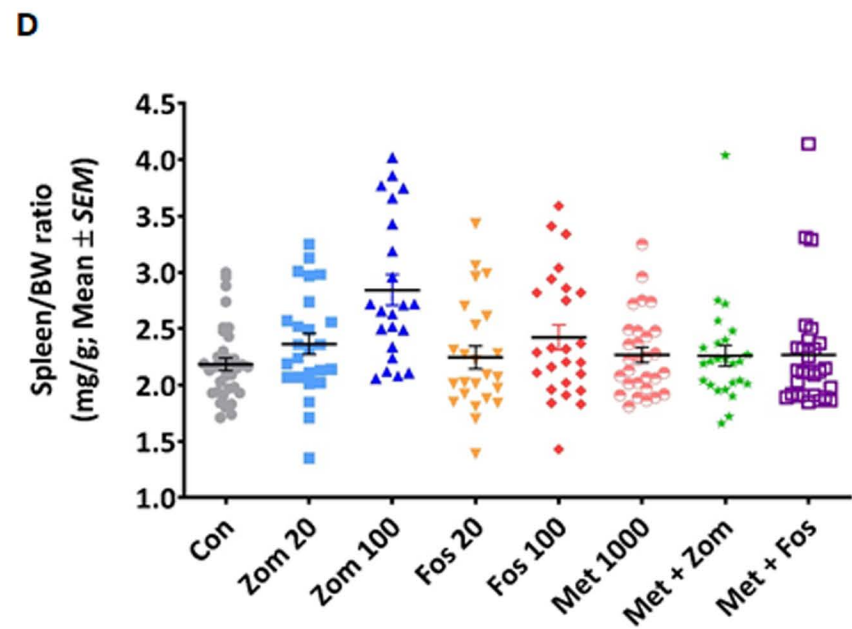

## Supplementary Figure 2

**A**

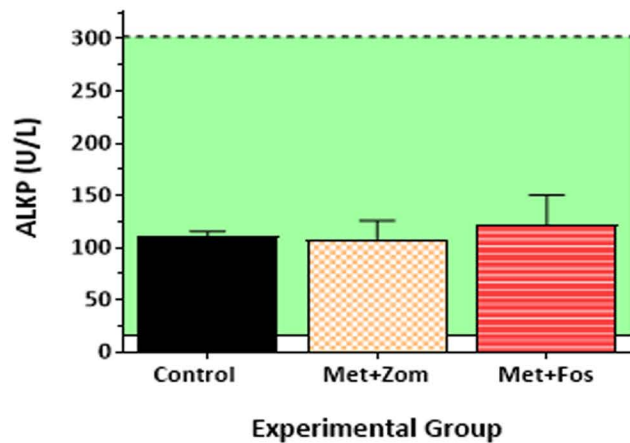

**B**

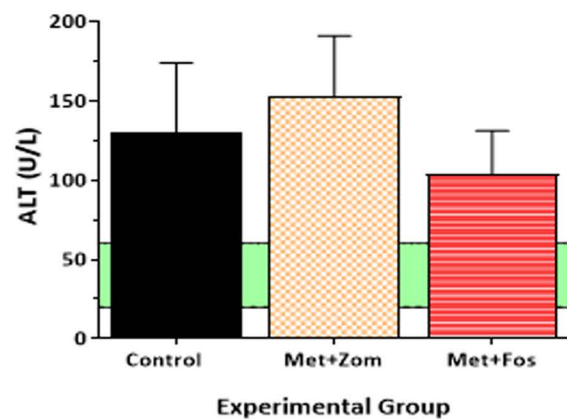

**C**

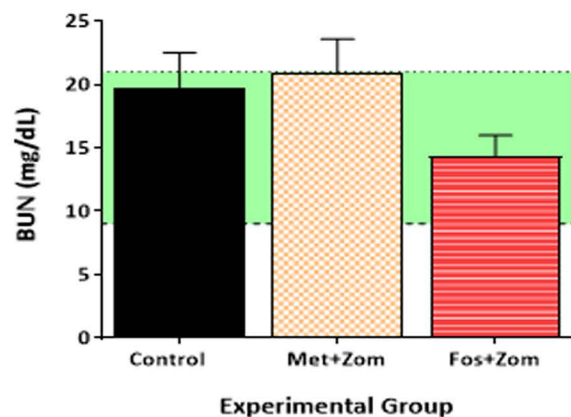

**D**

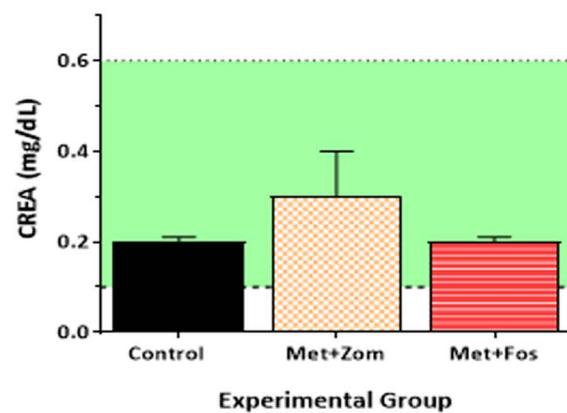

Supplement: NIHMS1542654-supplement-1.pdf [file NIHMS1542654-supplement-1.pdf]
